# Supplementary material for: Assessment of co-benefits of black carbon emission reduction measures in Southeast Asia: Part 2 emission scenarios for 2030 and co-benefits on mitigation of air pollution and climate forcing
Source: Copernicus journal article supplement (doi:10.5194/acp-2017-316), 2017-05-02
Supplement: Supplementary file 1 [file acp-2017-316-supplement.pdf]

# **Assessment of co-benefits of black carbon emission reduction measures in Southeast Asia: Part 2 emission scenarios for 2030 and co-benefits on mitigation of air pollution and climate forcing**

Didin Agustian Permadi<sup>1</sup>, Nguyen Thi Kim Oanh<sup>1\*</sup> and Robert Vautard<sup>2</sup>

<sup>1</sup> *Environmental Engineering and Management; School of Environment, Resources and Development; Asian Institute of Technology; Klong Luang, Pathumthani 12120, Thailand.*

<sup>2</sup> *Laboratoire des Sciences du Climat de l'Environnement (LSCE), Institut Pierre Simon Laplace (IPSL), Gif Sur Yvette, France.*

Correspondence to: Nguyen Thi Kim Oanh ([kimoanh@ait.ac.th](mailto:kimoanh@ait.ac.th))

**Table S1: Description of mitigation measures for RED2030 Scenario for Indonesia and Thailand**

**Table S2: Summary of projected activity data used for BAU2030**

**Figure S1: Annual average concentrations of BC and OC obtained from global LMDZ/INCA simulation for 2006 and 2030 and the constructed 2030/2006 ratios for both species**

**Figure S2: Comparison of sectoral emissions in the BY2007 with BAU2030 and RED2030 scenarios for Indonesia and Thailand**

**Table S1: Description of mitigation measures for RED2030 Scenario for Indonesia and Thailand.**

| No | Sector               | Description of RED2030 measures                                                                                                                                                            |                                                                                                                                                   |
|----|----------------------|--------------------------------------------------------------------------------------------------------------------------------------------------------------------------------------------|---------------------------------------------------------------------------------------------------------------------------------------------------|
|    |                      | Indonesia                                                                                                                                                                                  | Thailand                                                                                                                                          |
| 1  | Transportation       | All personal cars would have to comply with Euro2 in 2030 <sup>a</sup>                                                                                                                     | All personal cars <1,600 CC in the market in 2030 would have fuel consumption 5 liters/100 km and would comply with Euro4 standard <sup>e</sup>   |
|    |                      | 100% of public diesel buses would be shifted to CNG <sup>b</sup>                                                                                                                           | Implementation of cleaner fuel of CNG for all public buses and taxi in 2030 <sup>f</sup>                                                          |
| 2  | Residential          | Full implementation of "zero kero" program to cover 42 million (64%) households converted from kerosene to LPG by 2012 and 80% of number of households as end-point (by 2030) <sup>c</sup> | 50% of total fuel consumption of wood and charcoal in 2030 would be converted to LPG <sup>f</sup>                                                 |
|    |                      | Substitution of traditional fuel wood cook stoves to cleaner biomass stoves (gasifier stoves) <sup>b</sup>                                                                                 | Electricity to replace biomass (in 2030 20% of fuel wood would be converted to electricity) <sup>f</sup>                                          |
| 3  | Industry             | Fuel switch from coal to biomass and natural gas for cement, iron steel, pulp and paper, and textiles and fertilizer industries <sup>b</sup>                                               | Increasing efficiency of boilers (new rotary burners) and furnaces (by preheating fuel) that could save energy of around 16% by 2030 <sup>e</sup> |
|    |                      | Modernization of process from wet to dry kiln in cement industry and increasing efficiency of boilers and furnace that could save energy around 16% by 2030 <sup>b</sup>                   | Full implementation of maximum feasible reduction (application of air pollution control devices) in cement and iron industry by 2030 <sup>e</sup> |
| 4  | Biomass open burning | 20% reduction of burned area for forest fire and crop residue open burning in 2014 and around 40% in 2030 as compared to the year of 2010 <sup>d</sup> (National strategic plan 2010)      | Forest area burned would not be over than 48,000 ha y <sup>-1</sup> (2030) <sup>g</sup> (National master plan)                                    |
|    |                      | Zero burning of solid waste by 2030 due to improved SW management in most of urban areas <sup>c</sup>                                                                                      | Zero burning policy to re-use of crop residue as bio-energy up to 25% from total energy demand in 2030 <sup>g</sup>                               |
|    |                      |                                                                                                                                                                                            | Amount of solid waste subjected to burn should be reduced at least 75% through adequate solid waste management system in 2030 <sup>g</sup>        |

Source:

<sup>a</sup> Clean Air Asia (CAI, 2010). Roadmap of Euro standard in Asian Countries.

<sup>b</sup> Indonesia Climate Change Sectoral Roadmap (ICCSR, 2010).

<sup>c</sup> Energy Sector Management Assistance Program (ESMAP, 2012). Low carbon country studies: Indonesia.

<sup>d</sup> Ministry of Forestry (MoF, 2010). Strategic Plan 2010-2014. Converted from number of hotspot (active fire count) to the burned area.

<sup>e</sup> Chotichanatawewong and Thongplew (2012). Development trajectory, emission profile and policy actions.

<sup>f</sup> Department of Alternative Energy Development and Efficiency (DEDE, 2009). Renewable Energy Development Plant.

<sup>g</sup> National Master Plan of Open Burning in Thailand. PCD (2007).

**Table S2: Summary of projected activity data used for BAU2030**

| No | Activity data                           | Indonesia                                       | Thailand               | 2030/2007 ratio<br>(Indonesia) | 2030/2007 ratio<br>(Thailand) |
|----|-----------------------------------------|-------------------------------------------------|------------------------|--------------------------------|-------------------------------|
| 1  | Population                              | 1998-2007 <sup>a</sup>                          | 1994-2007 <sup>c</sup> | 1.8                            | 1.3                           |
| 2  | Total number of motor vehicles          | 1998-2007 <sup>b</sup>                          | 1988-2007 <sup>f</sup> | 3.1                            | 2.2                           |
| 3  | Total crop production                   | 1998-2007 <sup>a</sup>                          | 1996-2007 <sup>g</sup> | 1.4                            | 1.2                           |
| 4  | Livestock population                    | 1998-2007 <sup>a</sup>                          | 1996-2007 <sup>g</sup> | 1.8                            | 1.7                           |
| 5  | Petroleum refinery production           | 1998-2007 <sup>c</sup>                          | 2003-2007 <sup>h</sup> | 2.1                            | 3.3                           |
| 6  | Mining production                       | 1998-2007 <sup>c</sup>                          | 2003-2007 <sup>h</sup> | 2.0                            | 1.1                           |
| 7  | Aviation landing and take off           | 1998-2007 <sup>a</sup>                          | 2003-2007 <sup>i</sup> | 2.4                            | 1.1                           |
| 9  | GDP in forestry sector                  | 1998-2007 <sup>a</sup>                          | -                      | 0.7                            | -                             |
| 10 | Forestry area                           | -                                               | 1992-2001 <sup>e</sup> | -                              | 0.9                           |
| 11 | Energy consumption in power generation  | 2000-2007 <sup>c</sup>                          | 1988-2007 <sup>h</sup> | 1.8                            | 2.1                           |
| 12 | Energy consumption in industrial sector | 2000-2007 <sup>c</sup>                          | 1988-2007 <sup>h</sup> | 1.9                            | 2.0                           |
| 13 | Total GDP                               | 2000-2007(all other SEA countries) <sup>d</sup> |                        | 2.2                            |                               |

Data sources:

<sup>a</sup> National Bureau of Statistics (BPS, 2008). Indonesia in figure 2008.

<sup>b</sup> Department of Land Transportation (DLT, 2008). Transportation Statistics 2008.

<sup>c</sup> Ministry of Energy and Mineral Resources (MEMR, 2008). Key Indicator of Indonesia Energy and Mineral Resources 2008.

<sup>d</sup> The World Bank (WB, 2008). <http://data.worldbank.org/indicator/NY.GDP.PCAP.KD.ZG>. Population weighted GDP from other SEA countries and China for the period of 2000-2007 was collected to project to 2030. The GDP growth factor expressed as the ratio of 2030/2007 population weighted GDP was calculated and was used to project emissions for other SEA countries and Southern part of China.

<sup>e</sup> Thailand National Statistics Office (NSO, 2008).

<sup>f</sup> Ministry of Transportation (DLT, 2008). Transportation Statistics. Department of Land Transport (DLT) (2008).

<sup>g</sup> Office of Agricultural Economics (OAE, 2008). Agricultural Statistics of Thailand 2008.

<sup>h</sup> Energy Policy and Planning Office (EPPO, 2008). Statistics database.

<sup>i</sup> Department of Civil Aviation (DCA, 2008). Statistics report.

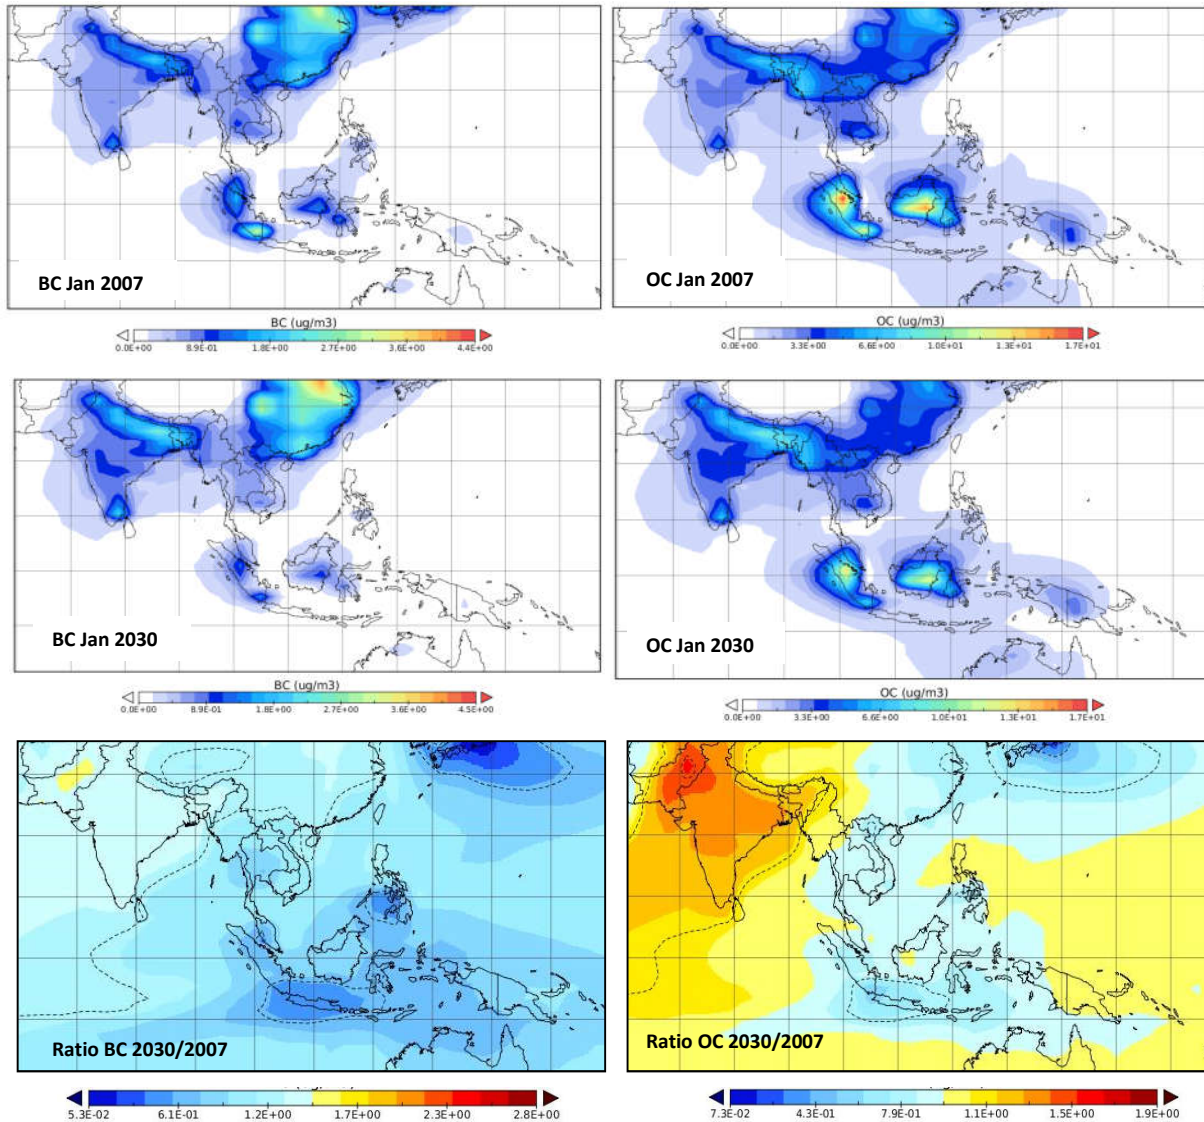

**Figure S1: Annual average concentrations of BC and OC obtained from global LMDZ/INCA simulation for 2006 and 2030 and the constructed 2030/2006 ratios for both species (Data from Dr Didier Hauglustaine, through personal communication)**

**Note: dotted lines show the ratio of 1.0**

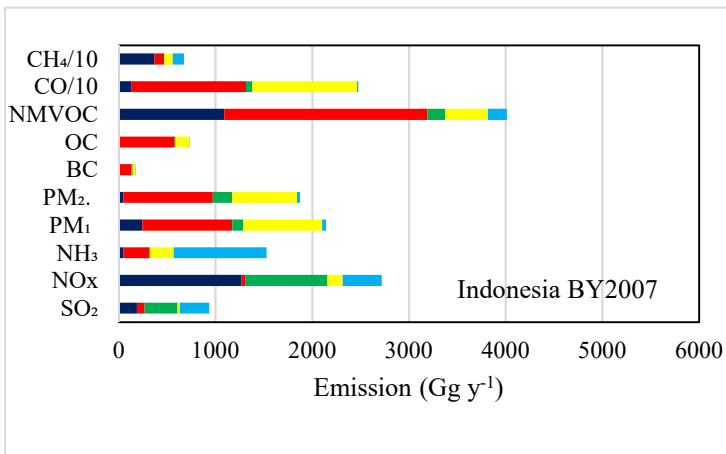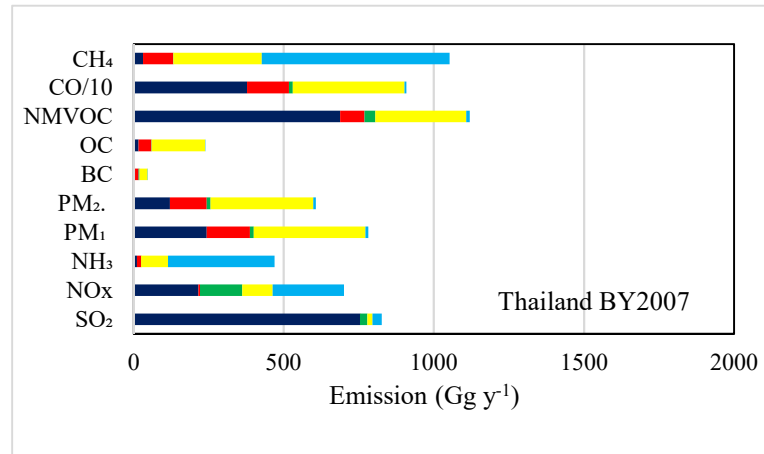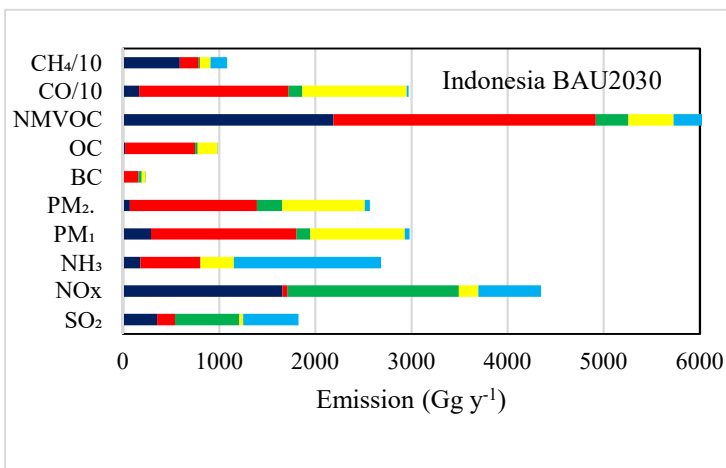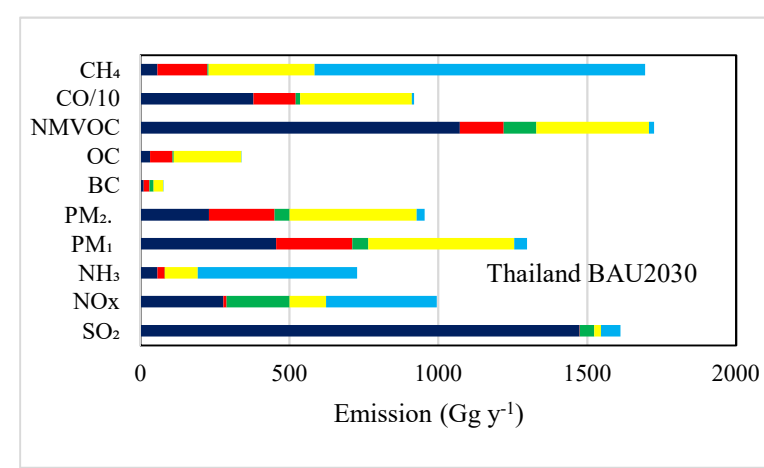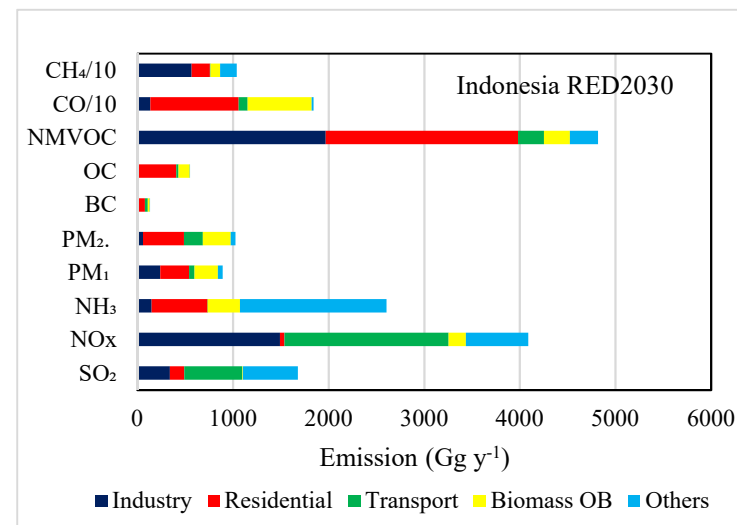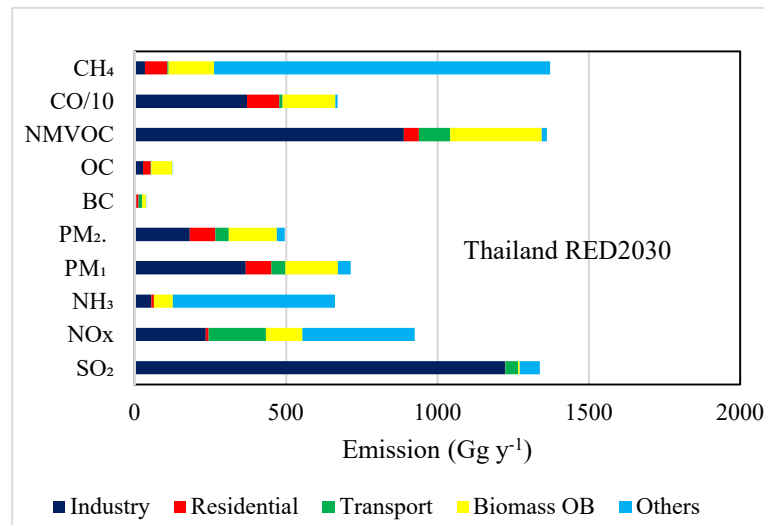

a) Indonesia

b) Thailand

Figure S2: Sectoral emissions of key species in BY2007, BAU2030 and RED2030 scenarios for Indonesia and Thailand
